# Supplementary material for: Sex Difference and Rupture Rate of Intracranial Aneurysms: An Individual Patient Data Meta-Analysis
Source: PubMed Central journal article supplement (PMC8785514; doi:10.1161/strokeaha.121.035187), 2022-01-05

## **SUPPLEMENTAL MATERIAL**

**Supplemental Table 1. Baseline characteristics of all separate cohorts.**

**Supplemental Table II. Risk of bias assessment tool (QUIPS).**

**Supplemental Table 111. Baseline characteristics of all patients with and without aneurysm rupture.**

**Supplemental Figures I. Search strings.**

**Supplemental Figure II. Complete case analysis: hazard ratio (HR) of the rupture rate in women compared to men adjusted for the PHASES score, smoking and positive family history of aneurysmal subarachnoid hemorrhage, analyzing the data per patient.**

**Supplemental Table I. Baseline characteristics of all separate cohorts.**

|                         | Juvela et al <sup>12</sup> |         | Lindgren et al <sup>20</sup> |          | Mensing et al <sup>13</sup> |         | Wermer et al <sup>16</sup> |          | Molenberg et al <sup>17</sup> |         | Sonobe et al <sup>18</sup> |           | Morita et al <sup>14</sup> |          | Murayama et al <sup>15</sup> |          | Gondar et al <sup>19</sup> |         |
|-------------------------|----------------------------|---------|------------------------------|----------|-----------------------------|---------|----------------------------|----------|-------------------------------|---------|----------------------------|-----------|----------------------------|----------|------------------------------|----------|----------------------------|---------|
|                         | Women                      | Men     | Women                        | Men      | Women                       | Men     | Women                      | Men      | Women                         | Men     | Women                      | Men       | Women                      | Men      | Women                        | Men      | Women                      | Men     |
| Number of patients      | 75                         | 65      | 693                          | 488      | 320                         | 154     | 70                         | 23       | 145                           | 53      | 236                        | 132       | 3799                       | 1903     | 1039                         | 522      | 225                        | 66      |
| Age (mean, SD)          | 42 ± 11                    | 41 ± 10 | 57 ± 13                      | 54 ± 11  | 55 ± 11                     | 57 ± 11 | 51 ± 10                    | 51 ± 11  | 56 ± 11                       | 57 ± 11 | 63 ± 10                    | 60 ± 10   | 63 ± 10                    | 61 ± 10  | 66 ± 12                      | 64 ± 11  | 56 ± 15                    | 53 ± 15 |
| Hypertension            | 24 (32)                    | 26 (40) | 302 (44)                     | 186 (38) | 130 (41)                    | 67 (44) | 38 (54)                    | 11 (48)  | 70 (48)                       | 19 (36) | 107 (45)                   | 53 (40)   | 1682 (44)                  | 789 (41) | 479 (46)                     | 253 (49) | 101 (45)                   | 38 (58) |
| Smoking                 | 39 (52)                    | 60 (92) | 273 (39)                     | 310 (64) | 146 (46)                    | 61 (40) | 62 (89)                    | 22 (96)  | 76 (52)                       | 29 (55) | 89 (38)                    | 85 (64)   | 340 (9)                    | 617 (32) | 220 (21)                     | 287 (55) | 112 (50)                   | 41 (62) |
| Previous aSAH           | 67 (89)                    | 62 (95) | 21 (3)                       | 23 (5)   | 0                           | 0       | 59 (84)                    | 18 (78)  | 68 (47)                       | 13 (25) | 25 (11)                    | 9 (7)     | 138 (4)                    | 48 (3)   | 28 (3)                       | 15 (3)   | 3 (1)                      | 0       |
| Positive family history | 12 (16)                    | 15 (23) | 161 (23)                     | 87 (18)  | 44 (14)                     | 18 (12) | 23 (33)                    | 6 (26)   | 42 (29)                       | 18 (34) | 24 (10)                    | 12 ((9)   | 220 (6)                    | 107 (6)  | 134 (13)                     | 50 (10)  | 27 (12)                    | 10 (15) |
| Multiple aneurysms      | 19 (25)                    | 14 (22) | 247 (36)                     | 150 (31) | 86 (27)                     | 23 (15) | 19 (27)                    | 5 (22)   | 7 (5)                         | 8 (15)  | 42 (18)                    | 23 (17)   | 587 (15)                   | 201 (11) | 387 (37)                     | 121 (23) | 47 (21)                    | 9 (14)  |
| Size                    |                            |         |                              |          |                             |         |                            |          |                               |         |                            |           |                            |          |                              |          |                            |         |
| < 7.0 mm                | 61 (81)                    | 54 (83) | 484 (70)                     | 332 (68) | 154 (48)                    | 67 (44) | 70 (100)                   | 23 (100) | 127 (88)                      | 37 (70) | 236 (100)                  | 132 (100) | 2670 (70)                  | 1402(74) | 984 (95)                     | 505 (97) | 212 (94)                   | 59 (89) |
| 7.0-9.9 mm              | 8 (11)                     | 8 (12)  | 97 (14)                      | 88 (18)  | 85 (27)                     | 47 (31) | 0                          | 0        | 14 (10)                       | 10 (19) | 0                          | 0         | 651 (17)                   | 306 (16) | 24 (2)                       | 10 (2)   | 8 (4)                      | 5 (8)   |
| 10.0-19.9 mm            | 4 (5)                      | 2 (3)   | 92 (13)                      | 49 (10)  | 69 (22)                     | 32 (21) | 0                          | 0        | 4 (3)                         | 4 (8)   | 0                          | 0         | 418 (11)                   | 172 (9)  | 25 (2)                       | 5 (1)    | 5 (2)                      | 2 (3)   |
| > 20.0 mm               | 2 (3)                      | 1 (2)   | 20 (3)                       | 19 (4)   | 11 (3)                      | 8 (5)   | 0                          | 0        | 0                             | 2 (4)   | 0                          | 0         | 60 (2)                     | 23 (1)   | 6 (1)                        | 2 (0)    | 0                          | 0       |
| Aneurysm location       |                            |         |                              |          |                             |         |                            |          |                               |         |                            |           |                            |          |                              |          |                            |         |
| ICA                     | 37 (49)                    | 23 (35) | 140 (20)                     | 66 (14)  | 63 (20)                     | 10 (7)  | 11 (16)                    | 2 (9)    | 29 (20)                       | 9 (17)  | 92 (39)                    | 50 (38)   | 789 (21)                   | 282 (15) | 311 (30)                     | 125 (24) | 90 (40)                    | 20 (30) |
| MCA                     | 30 (40)                    | 32 (49) | 321 (46)                     | 230 (47) | 106 (33)                    | 68 (44) | 29 (41)                    | 10 (44)  | 62 (43)                       | 23 (43) | 82 (35)                    | 49 (37)   | 1333 (35)                  | 694 (36) | 281 (27)                     | 128 (25) | 80 (36)                    | 18 (27) |
| ACA & P                 | 8 (11)                     | 10 (15) | 232 (34)                     | 192 (39) | 151 (47)                    | 76 (49) | 30 (43)                    | 11 (48)  | 54 (37)                       | 21 (40) | 62 (26)                    | 33 (25)   | 1677 (44)                  | 927 (49) | 447 (43)                     | 269 (52) | 54 (24)                    | 28 (42) |

|                           |                |                 |                  |                  |                |                  |            |            |           |                  |                  |                  |                  |                  |                  |                  |                  |                  |
|---------------------------|----------------|-----------------|------------------|------------------|----------------|------------------|------------|------------|-----------|------------------|------------------|------------------|------------------|------------------|------------------|------------------|------------------|------------------|
| Phases (median, range)    | 8 (5-15)       | 8 (5-14)        | 9 (5-21)         | 9 (5-20)         | 5 (0-15)       | 5 (0-15)         | 4 (1-6)    | 5 (1-6)    | 4 (0-11)  | 4 (0-16)         | 6 (3-10)         | 5 (3-9)          | 7 (3-19)         | 7 (3-19)         | 7 (3-19)         | 7 (3-17)         | 2 (0-12)         | 4 (0-10)         |
| Phases (mean, SD)         | 8.3 ± 2.4      | 8.6 ± 2.2       | 9.4 ± 3.2        | 9.6 ± 3.1        | 5.5 ± 3.3      | 6.1 ± 3.4        | 4.0 ± 1.6  | 4.2 ± 1.7  | 3.9 ± 2.0 | 4.6 ± 3.0        | 5.6 ± 1.8        | 5.4 ± 1.6        | 7.6 ± 3.1        | 7.5 ± 2.8        | 6.5 ± 2.5        | 6.5 ± 2.2        | 2.5 ± 2.1        | 3.4 ± 2.3        |
| Ruptured aneurysms        | 22             | 10              | 8                | 6                | 8              | 2                | 0          | 0          | 0         | 1                | 5                | 1                | 79               | 27               | 41               | 14               | 1                | 2                |
| Person-years of follow-up | 1764.4         | 1259.2          | 1163.6           | 898.09           | 799.5          | 377.08           | 234.1      | 82.4       | 150.7     | 56.6             | 814.1            | 485.9            | 6329.77          | 3271.89          | 3858.28          | 1901.12          | 706.58           | 227.3            |
| Follow-up years (median)  | 23.5 (1-52)    | 15.4 (1-50)     | 0.5 (0-18)       | 0.5 (0-23)       | 0.7 (0-21)     | 1 (0-18)         | 2.2 (1-15) | 2.3 (1-10) | 1 (0-2)   | 1 (0-2)          | 3.2 (0-7)        | 3.3 (0-7)        | 1.0 (0-8)        | 1.0 (0-9)        | 3.2 (0-11)       | 3.1 (0-11)       | 2.5 (0-13)       | 2.7 (0-10)       |
| Rupture rate              | 1.25 (0.8-1.9) | 0.79 (4.0-14.2) | 0.69 (0.32-1.31) | 0.69 (0.27-1.39) | 1.0 (0.46-1.9) | 0.53 (0.09-1.75) | -          | -          | -         | 1.77 (0.09-8.71) | 0.61 (0.23-1.36) | 0.21 (0.01-1.02) | 1.25 (0.99-1.55) | 0.83 (0.55-1.18) | 1.06 (0.77-1.43) | 0.74 (0.42-1.21) | 0.14 (0.01-0.70) | 0.88 (0.15-2.91) |

aSAH: aneurysmal subarachnoid hemorrhage, SD: standard deviation, ICA: internal carotid artery, MCA: middle cerebral artery, ACA: anterior cerebral arteries, P: posterior circulation.

**Supplemental Table II. Risk of bias assessment tool (QUIPS).**

|                               | <b>Study participation</b> | <b>Study attrition</b> | <b>Prognostic factor measurement</b> | <b>Outcome measurement</b> | <b>Study confounding</b> | <b>Statistical analysis reporting</b> |
|-------------------------------|----------------------------|------------------------|--------------------------------------|----------------------------|--------------------------|---------------------------------------|
| Juvela et al <sup>12</sup>    | moderate                   | low                    | low                                  | moderate                   | moderate                 | low                                   |
| Mensing et al <sup>13</sup>   | low                        | high                   | low                                  | moderate                   | moderate                 | low                                   |
| Morita et al <sup>14</sup>    | low                        | moderate               | low                                  | moderate                   | moderate                 | low                                   |
| Murayama et al <sup>15</sup>  | low                        | low                    | low                                  | low                        | moderate                 | low                                   |
| Wermer et al <sup>16</sup>    | low                        | low                    | low                                  | moderate                   | low                      | low                                   |
| Molenberg et al <sup>17</sup> | low                        | high                   | low                                  | low                        | low                      | low                                   |
| Sonobe et al <sup>18</sup>    | low                        | moderate               | low                                  | low                        | low                      | low                                   |
| Gondar et al <sup>19</sup>    | low                        | low                    | low                                  | moderate                   | low                      | low                                   |
| Lindgren et al <sup>20</sup>  | low                        | moderate               | low                                  | moderate                   | moderate                 | low                                   |

**Table III. Baseline characteristics of patients with and without aneurysm rupture.**

| <b>Pooled data</b>                 | <b>No aneurysm rupture (n,%)</b> | <b>Aneurysm rupture (n,%)</b> | <b>Total (n,%)</b> | <b>p-value</b> |
|------------------------------------|----------------------------------|-------------------------------|--------------------|----------------|
| Number of patients                 | 9714                             | 226                           | 9940               |                |
| Women                              | 6392 (66)                        | 163 (72)                      | 6555 (66)          | 0.047          |
| Mean age (range)                   | 61.0 (15-100)                    | 63.7 (23-93)                  | 61.1 (15-100)      | 0.001          |
| Hypertension #                     | 4230 (44)                        | 114 (50)                      | 4344 (44)          | 0.039          |
| Ever smoker #                      | 2772 (29)                        | 58 (26)                       | 2830 (29)          | 0.34           |
| Previous aSAH                      | 556 (6)                          | 37 (16)                       | 593 (6)            | <0.001         |
| Positive family history for aSAH # | 969 (10)                         | 23 (10)                       | 992 (10)           | 0.92           |
| Population                         |                                  |                               |                    | 0.004          |
| Finnish                            | 1275 (13)                        | 46 (20)                       | 1321 (13)          |                |
| Japanese                           | 7408 (76)                        | 166 (74)                      | 7574 (76)          |                |
| Dutch                              | 743 (8)                          | 11 (5)                        | 754 (8)            |                |
| Swiss                              | 228 (3)                          | 3 (1)                         | 291 (3)            |                |
| Multiple aneurysms                 | 1960 (0)                         | 58 (0)                        | 2018 (20)          | <0.001         |

|                                                        |                         |                         |                         |        |
|--------------------------------------------------------|-------------------------|-------------------------|-------------------------|--------|
| Aneurysm size                                          |                         |                         |                         | <0.001 |
| < 7.0 mm                                               | 7435 (77)               | 105 (47)                | 7540 (76)               |        |
| 7.0-9.9 mm                                             | 1320 (14)               | 42 (19)                 | 1326 (14)               |        |
| 10.0-19.9 mm                                           | 828 (9)                 | 56 (25)                 | 884 (9)                 |        |
| > 20.0 mm                                              | 131 (1)                 | 23 (10)                 | 154 (2)                 |        |
| Aneurysm location                                      |                         |                         |                         | <0.001 |
| Internal carotid artery                                | 2107 (22)               | 28 (12)                 | 2135 (22)               |        |
| Middle cerebral artery                                 | 3483 (36)               | 64 (28)                 | 3547 (36)               |        |
| Anterior circulation or posterior circulation          | 4124 (43)               | 134 (59)                | 4258 (43)               |        |
| Phases score (median, range, mean, standard deviation) | 7.0 (0-21)<br>7.2 ± 3.1 | 9.0 (2-20)<br>9.8 ± 4.0 | 7.0 (0-21)<br>7.2 ± 3.1 | <0.001 |

aSAH; aneurysmal subarachnoid hemorrhage.

# Data are missing for hypertension in 87 persons (1%), for smoking in 235 persons (2%) and for family history of aSAH in 146 persons (1%).

## Figure I. Search strings.

### Pubmed search string

#1:

"intracranial aneurysm"[Title/Abstract] OR "intracranial saccular aneurysm"[Title/Abstract]  
OR  
"cerebral aneurysm"[Title/Abstract] OR "intracranial aneurysms"[Title/Abstract] OR  
"intracranial  
saccular aneurysms"[Title/Abstract] OR "cerebral aneurysms"[Title/Abstract]

#2:

"risk of rupture"[Title/Abstract] OR "aneurysm rupture"[Title/Abstract] OR "risk  
factors"[Title/Abstract]  
OR "rupture"[Title/Abstract] OR "unruptured"[Title/Abstract] OR "subarachnoid  
hemorrhage"[Title/Abstract]

#3:

"follow-up"[Title/Abstract] OR "follow up"[Title/Abstract] OR "natural  
history"[Title/Abstract] OR "natural  
course"[Title/Abstract]

#1 AND #2 AND #3

### Embase search string

#1:

'intracranial aneurysm':ti:ab OR 'intracranial saccular aneurysm':ti:ab OR 'cerebral  
aneurysm':ti:ab OR  
'intracranial aneurysms':ti:ab OR 'intracranial saccular aneurysms':ti:ab OR 'cerebral  
aneurysms':ti:ab

#2:

'risk of rupture':ti:ab OR 'aneurysm rupture':ti:ab OR 'risk factors':ti:ab OR 'rupture':ti:ab  
OR  
'unruptured':ti:ab OR 'subarachnoid hemorrhage':ti:ab – 339.423

#3:

'follow-up':ti:ab OR 'follow up':ti:ab OR 'natural history':ti:ab OR 'natural course':ti:ab -  
688.714

#1 AND #2 AND #3

**Supplemental Table II. Complete case analysis: hazard ratio (HR) of the rupture rate in women compared to men adjusted for the PHASES score, smoking and positive family history of aneurysmal subarachnoid hemorrhage, analyzing the data per patient.**

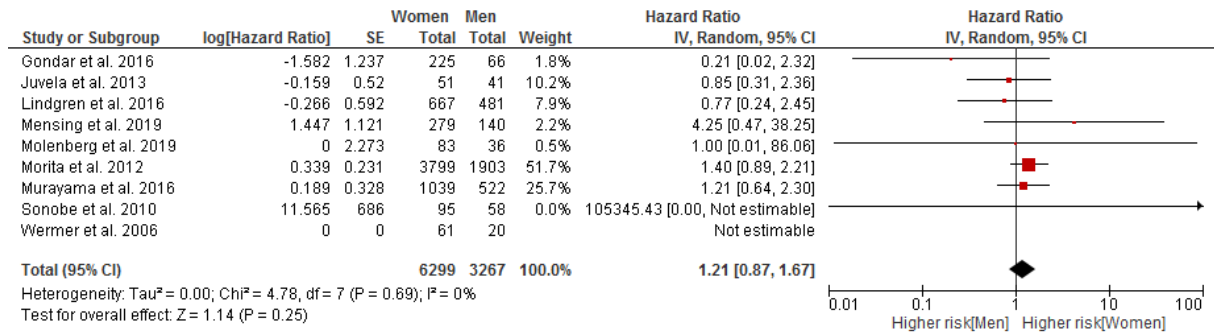

Supplement: str-53-362-s001.pdf [file str-53-362-s001.pdf]
